# Supplementary material for: Cytotoxic and Antiproliferative Effects of Diarylheptanoids Isolated from Curcuma comosa Rhizomes on Leukaemic Cells
Source: PubMed Central journal article supplement (PMC7700379; doi:10.3390/molecules25225476), 2020-11-23
Supplement: molecules-25-05476-s001.pdf [file molecules-25-05476-s001.pdf]

## SUPPLEMENTARY DATA

# Cytotoxic and Antiproliferative Effects of Diarylheptanoids Isolated from *Curcuma comosa* Rhizomes on Leukaemic Cells

Natsima Viriyaadhammaa <sup>1</sup>, Aroonchai Saijai <sup>2</sup>, Waranya Neimkhum <sup>3</sup>, Wariya Nirachonkul <sup>1</sup>, Wantida Chaiyana <sup>4</sup>, Sawitree Chiampanichayakul <sup>1,5</sup>, Singkome Tima <sup>1,5,6</sup>, Toyonobu Usuki <sup>7</sup>, Suwit Duangmano <sup>1,5,\*</sup> and Songyot Anuchapreeda <sup>1,5,6,\*</sup>

<sup>1</sup> Department of Medical Technology, Faculty of Associated Medical Sciences, Chiang Mai University, Chiang Mai 50200, Thailand; fai.natsima@gmail.com (N.V.); nirachonkul.w@gmail.com (W.N.); chiampanich@gmail.com (S.C.); singkome@gmail.com (S.T.)

<sup>2</sup> Department of Chemistry, Faculty of Science, Chiang Mai University, Chiang Mai 50200, Thailand; saiai\_aronchai@hotmail.com

<sup>3</sup> Department of Pharmaceutical Technology, Faculty of Pharmaceutical Sciences, Huachiew Chalermprakiet University, Samutprakarn 10250, Thailand; waranya.ne@gmail.com

<sup>4</sup> Department of Pharmaceutical Science, Faculty of Pharmacy, Chiang Mai University, Chiang Mai 50200, Thailand; aa\_rx105@hotmail.com

<sup>5</sup> Cancer Research Unit of Associated Medical Sciences (AMS CRU), Faculty of Associated Medical Sciences, Chiang Mai University, Chiang Mai 50200, Thailand

<sup>6</sup> Center for Research and Development of Natural Products for Health, Chiang Mai University, Chiang Mai 50200, Thailand

<sup>7</sup> Department of Materials and Life Sciences, Faculty of Science and Technology, Sophia University, Tokyo 102-8554, Japan; t-usuki@sophia.ac.jp

\* Correspondence: suwit.du@cmu.ac.th (S.D.); sanuchapreeda@gmail.com (S.A.); Tel.: +66-8875-13673 (S.D.); +66-5394-9237 (S.A.)

Academic Editors: Luisa Tesoriere and Alessandro Attanzio

**Abstract:** *Curcuma comosa* belongs to the Zingiberaceae family. In this study, two natural compounds were isolated from *C. comosa*, and their structures were determined using nuclear magnetic resonance. The isolated compounds were identified as 7-(3,4-dihydroxyphenyl)-5-hydroxy-1-phenyl-(1*E*)-1-heptene (**1**) and *trans*-1,7-diphenyl-5-hydroxy-1-heptene (**2**). Compound **1** showed the strongest cytotoxicity effect against HL-60 cells, while its antioxidant and anti-inflammatory properties were stronger than those of compound **2**. Compound **1** proved to be a potent antioxidant, compared to ascorbic acid. Neither compounds had any effect on red blood cell haemolysis. Furthermore, compound **1** significantly decreased Wilms' tumour 1 protein expression and cell proliferation in KG-1a cells. Both purified compounds decreased the WT1 protein levels in a time- and dose- dependent manner. Compound **1** suppressed cell cycle at the S phase. In conclusion, compound **1** has a promising chemotherapeutic potential against leukaemia.

**Keywords:** Zingiberaceae; *Curcuma comosa*; diarylheptanoids; cytotoxicity; antioxidant; anti-inflammatory; haemolysis; anticancer; Wilms' tumour 1

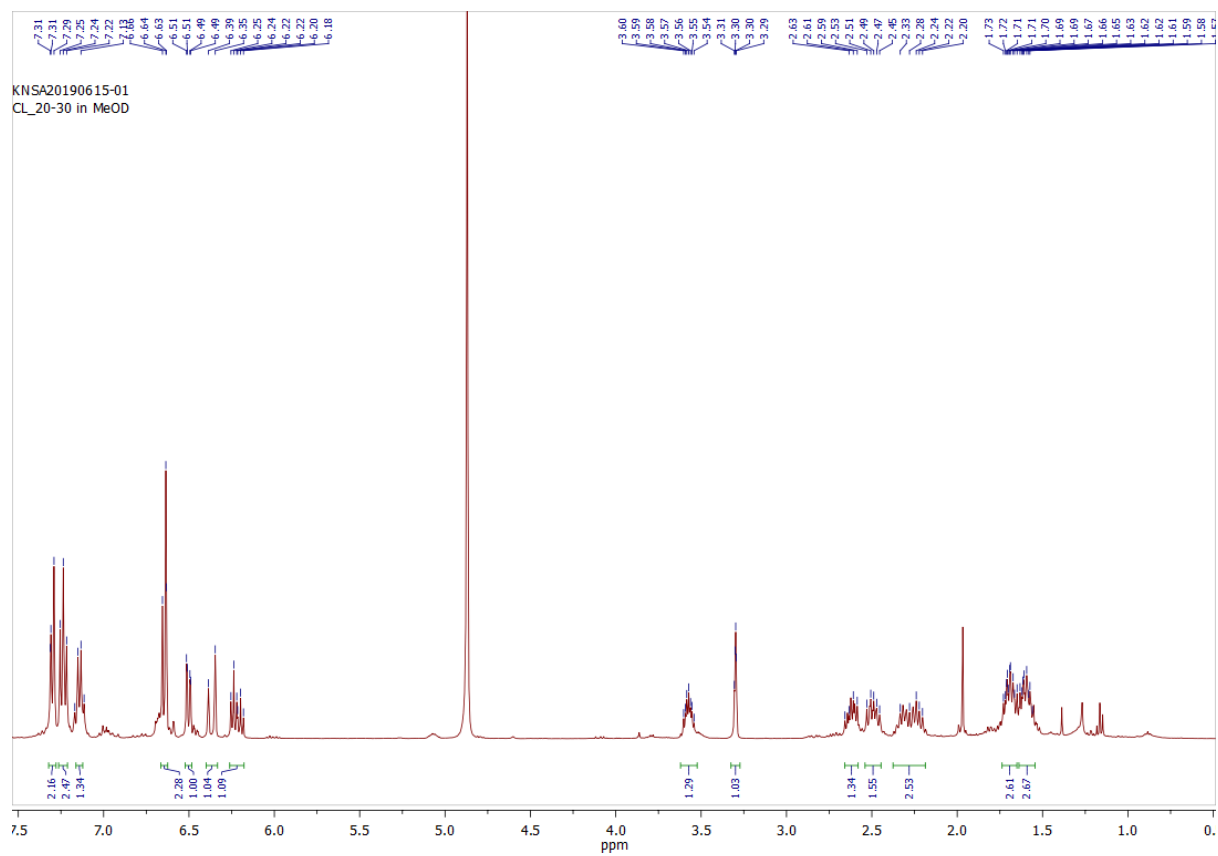

**Figure S1.**  $^1\text{H}$  NMR spectrum of compound **1** in  $\text{CDCl}_3$ .

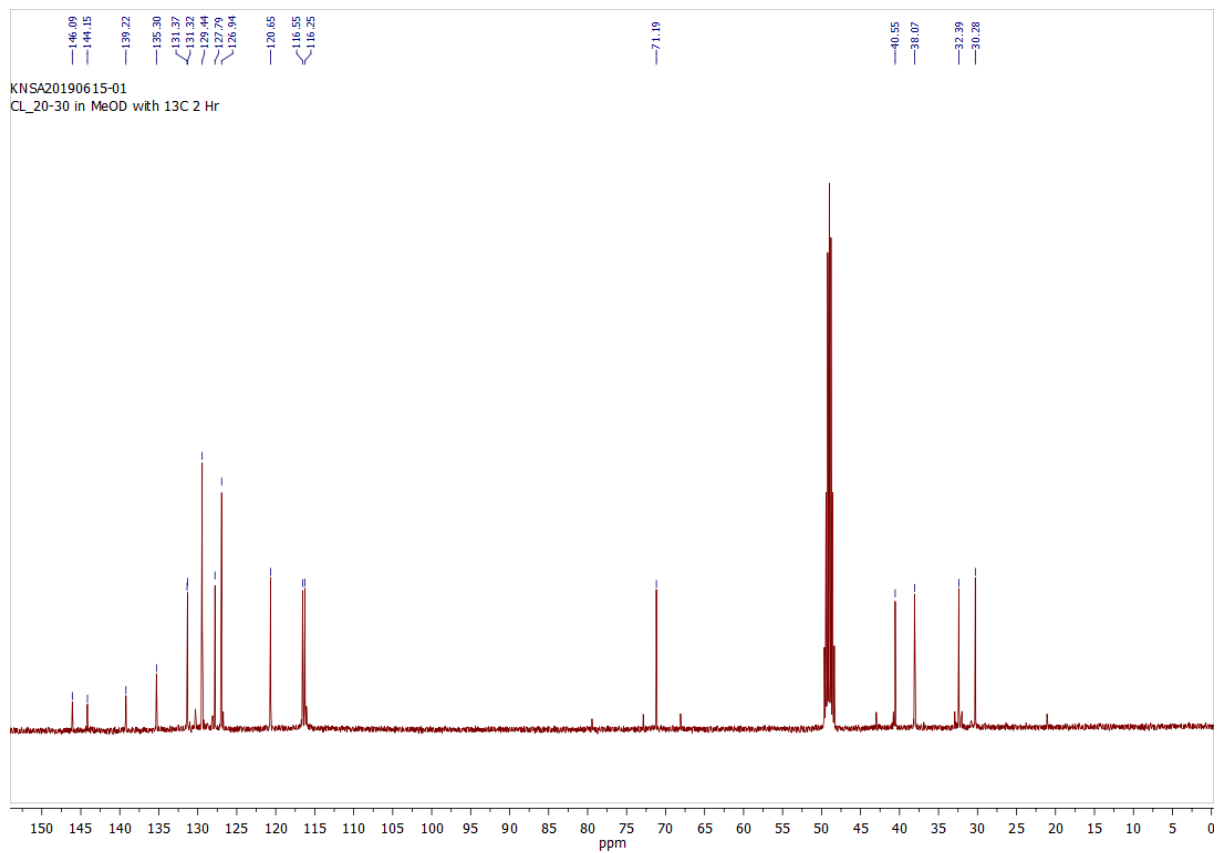

**Figure S2.**  $^{13}\text{C}$  NMR spectrum of compound **1** in  $\text{CDCl}_3$ .

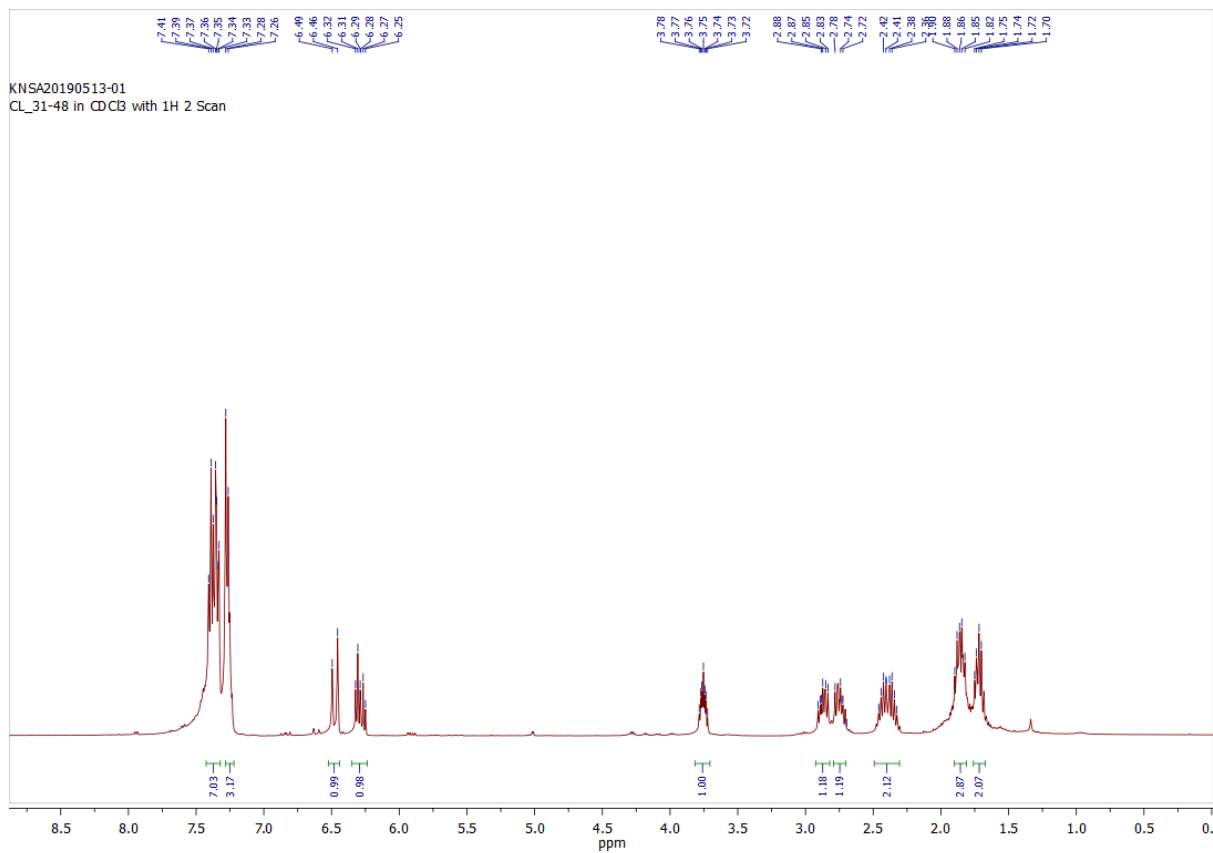

Figure S3. <sup>1</sup>H NMR spectrum of compound 2.

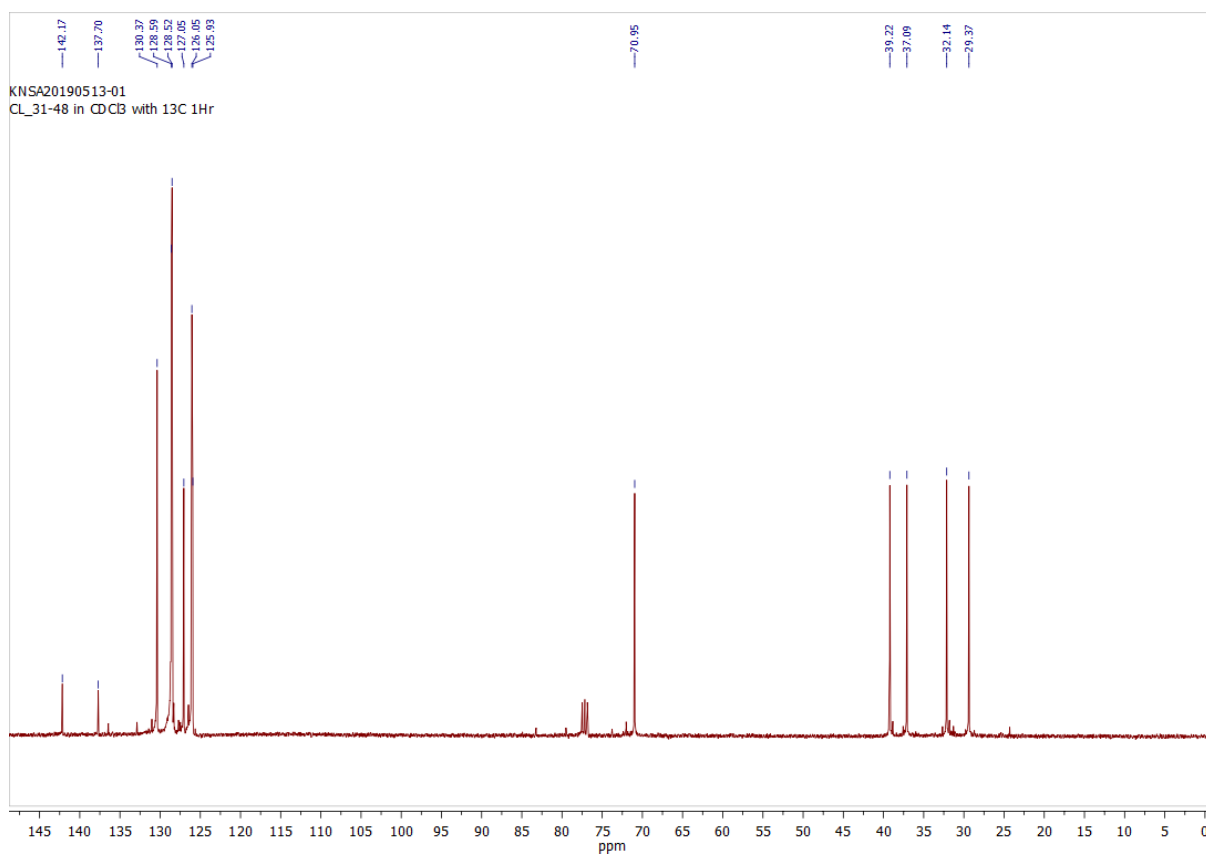

**Figure S4.** <sup>13</sup>C NMR spectrum of compound 2.
